# Supplementary material
Source: publisher figshare collection journal article supplement (https://plos.figshare.com/articles/dataset/_/7875140)

**S1 Figure – flow diagram of participants**

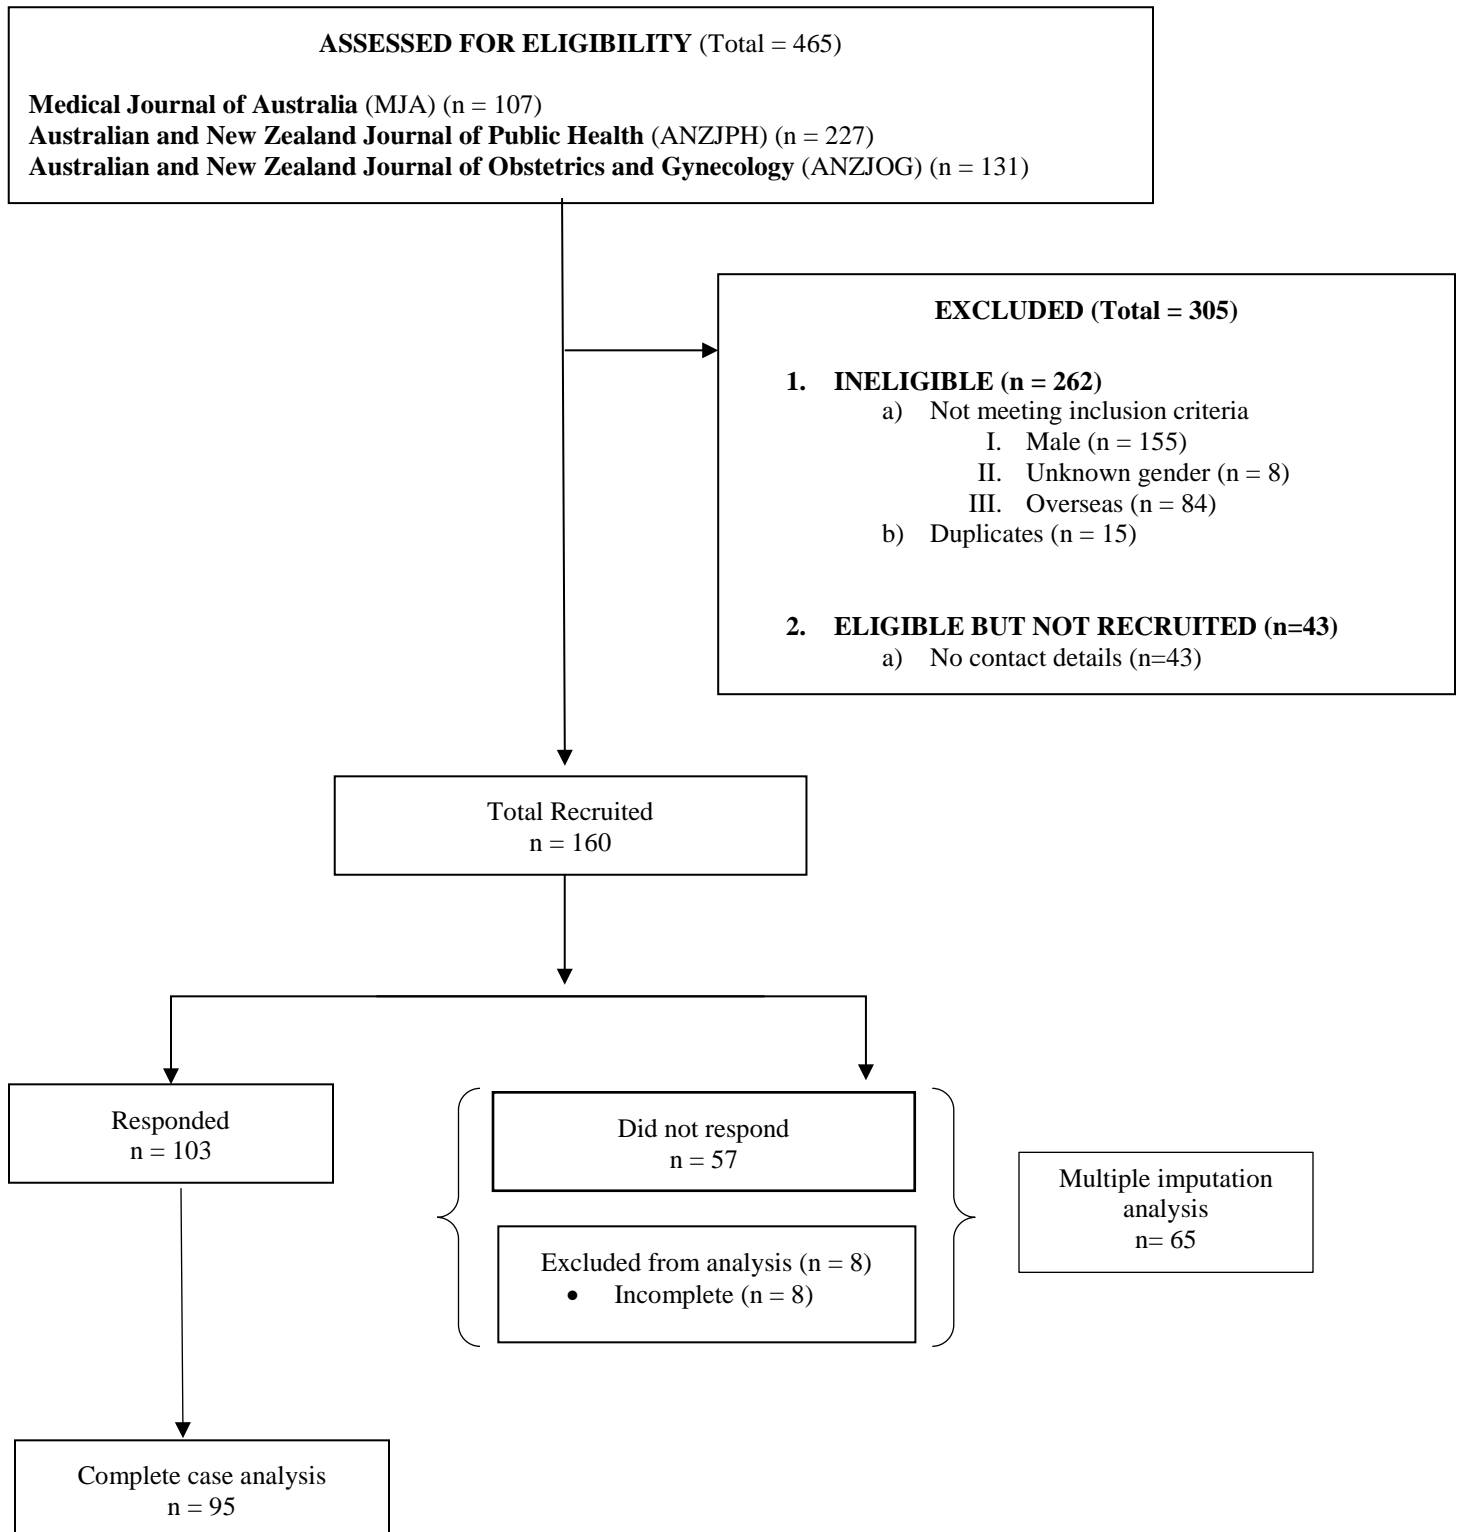

Supplement: Supplementary file [file 1]
